# Supplementary material
Source: Springer Nature journal article supplement (https://www.springermedizin.de/resource/supplementary/12889_2011_4971_MOESM1_ESM.pdf/9494206)
Supplement: MOESM1 [file 9494206]

*Praeventis random sample*

Dutch addresses (n = 6,000) of girls born in 1995 or 1996 stratified by ethnicity and vaccine uptake.

*Ethnicity:*

- 3,300 general sample;
- 2,700 selected sample of which 900 per ethnical group (Turkey, Morocco, and Surinam/Antilles).

*Vaccine uptake per general/selected sample:*

- One third with girls with  $\geq 1$  HPV injection;
- Two thirds with girls with 0 injections.

*Online panel random sample*

Mothers of girls born in 1995 or 1996 (n = 650)  
Daughters (n = 350 of the sample of mothers)

*Excluded* (n = 2;  
unknown address)

*Received invitation*  
Addresses (n = 5,998)

*Received invitation*  
Mothers (n = 650)  
Daughters (n = 350)

*Received reminder*  
Addresses (n = 5,929)

*Started with survey*  
Mothers (n = 564)  
Daughters (n = 537)

*Completed survey*  
Mothers (n = 445)  
Daughters (n = 404)

*Completed survey*  
Mothers (n = 511)  
Daughters (n = 243)

*Excluded*  
Mothers (n = 4): male (n = 3), invalid age (n = 1)  
Daughters (n = 5): male (n = 2), invalid age (n = 3)

*Data available for analyses*  
Mothers (n = 952)  
Daughters (n = 642)
